# Supplementary material
Source: HighWire-hosted journal article supplement (https://www.cmaj.ca/highwire/filestream/106436/field_highwire_adjunct_files/4/210842-res-5-at.pdf)
Supplement: 210842-res-5-at.pdf [file 210842-res-5-at.pdf]

### Appendix 5: Chow test for change in level and slope of time series following each intervention point

| Outcome                             | November 2009 Intervention         |                                 | September 2016 Intervention        |                                 | March 2018 Intervention            |                                 |
|-------------------------------------|------------------------------------|---------------------------------|------------------------------------|---------------------------------|------------------------------------|---------------------------------|
|                                     | Intercept shift (estimate, 95% CI) | Slope change (estimate, 95% CI) | Intercept shift (estimate, 95% CI) | Slope change (estimate, 95% CI) | Intercept shift (estimate, 95% CI) | Slope change (estimate, 95% CI) |
| Accidental Toxicity Rates (monthly) | 0.1595 (-0.4034 to 0.4593)         | -0.0003 (-0.0008 to 0.0002)     | 0.7614 (-1.270 to 2.793)           | -0.0011 (-0.0041 to 0.0018)     | 1.127 (-1.258 to 3.512)            | -0.0016 (-0.0050 to 0.0018)     |
| ICU Admission Rates (quarterly)     | -0.0645 (-0.4181 to 0.2890)        | 0.0003 (-0.0015 to 0.0021)      | 0.5128 (-1.9524 to 2.9779)         | -0.0023 (-0.0131 to 0.0085)     | -0.4410 (-0.3848 to 2.5029)        | 0.0018 (-0.0109 to 0.0146)      |
| Opioid Poisoning Rates (quarterly)  | 0.1567 (-0.1360 to 0.4495)         | -0.0006 (-0.0021 to 0.0008)     | 0.7635 (-1.2780 to 2.8049)         | -0.0033 (-0.0123 to 0.0057)     | 2.4899 (0.0520 to 4.9277)          | -0.0107 (-0.0213 to -0.0001)    |
